# Supplementary material for: Phosphorylation of Connexin36 near the C-terminus switches binding affinities for PDZ-domain and 14–3–3 proteins in vitro
Source: PubMed Central journal article supplement (PMC7592057; doi:10.1038/s41598-020-75375-0), 2020-10-27
Supplement: 41598_2020_75375_MOESM1_ESM.pdf [file 41598_2020_75375_MOESM1_ESM.pdf]

# **Phosphorylation of Connexin36 near the C-terminus switches binding affinities for PDZ-domain and 14-3-3 proteins *in vitro***

Stephan Tetenborg<sup>1,2</sup>, Helen Y. Wang<sup>2</sup>, Lena Nemitz<sup>3</sup>, Anne Depping<sup>1</sup>, Alexandra B. Espejo<sup>4</sup>, Jaya Aseervatham<sup>2</sup>, Mark T. Bedford<sup>4</sup>, Ulrike Janssen-Bienhold<sup>3,5</sup>, John O'Brien<sup>2,#</sup>, Karin Dedek<sup>1,5,#,\*</sup>

1 Animal Navigation/Neurosensorys, Institute for Biology and Environmental Sciences, University of Oldenburg, Oldenburg, Germany

2 Ruiz Department of Ophthalmology & Visual Science, The University of Texas Health Science Center at Houston, Houston, TX 77030, USA

3 Visual Neuroscience, Dept. of Neuroscience, University of Oldenburg, Oldenburg, Germany

4 Department of Epigenetics and Molecular Carcinogenesis, University of Texas M.D. Anderson Cancer Center, Smithville, TX 78957, USA

5 Research Center Neurosensory Science, University of Oldenburg, Oldenburg, Germany

# These authors contributed equally.

C-Terminal Domain Readers Array

| PDZ                                                                                                                                                                                                                                                                                                                                                                | PDZ                                                                                                                                                                                                                                                                                                                                             | PDZ                                                                                                                                                                                                                                                                                                                                                                               | 14-3-3 / 14-3-3 like                                                                                                                                                                                                                                                               |
|--------------------------------------------------------------------------------------------------------------------------------------------------------------------------------------------------------------------------------------------------------------------------------------------------------------------------------------------------------------------|-------------------------------------------------------------------------------------------------------------------------------------------------------------------------------------------------------------------------------------------------------------------------------------------------------------------------------------------------|-----------------------------------------------------------------------------------------------------------------------------------------------------------------------------------------------------------------------------------------------------------------------------------------------------------------------------------------------------------------------------------|------------------------------------------------------------------------------------------------------------------------------------------------------------------------------------------------------------------------------------------------------------------------------------|
| <b>A1)</b> α-1-syntrophin (1/1)/Q61234<br><b>A2)</b> β1-syntrophin (1/1)/Q99L88<br><b>A3)</b> γ1-syntrophin (1/1)/Q925E1<br><b>A4)</b> γ2-syntrophin (1/1)/Q925E0<br><b>A5)</b> Chapsyn-110 (2/3)/Q91XM9<br><b>A6)</b> Chapsyn-110 (3/3)/Q91XM9<br><b>A7)</b> Dlg3 (1/1)/Q6XE40<br><b>A8)</b> Dvl1 (1/1)/Q60838<br><b>A9)</b> Dvl2 (1/1)<br><b>A10)</b> Dvl3 (1/1) | <b>B1)</b> Cipp (3/10)/Q63ZW7<br><b>B2)</b> Cipp (5/10)/Q63ZW7<br><b>B3)</b> Cipp (8/10)/Q63ZW7<br><b>B4)</b> Cipp (9/10)/Q63ZW7<br><b>B5)</b> Cipp (10/10)/Q63ZW7<br><b>B6)</b> Radil (1/1)/Q69Z89<br><b>B7)</b> Erbin (1/1)/Q80TH2<br><b>B8)</b> GRASP55 (1/1)/Q99JX3<br><b>B9)</b> Grip1 (6/7)/Q925T6<br><b>B10)</b> Grip2 (5/7)/E0CX54      | <b>C1)</b> Harmonin (2/3)/Q9ES64<br><b>C2)</b> HtrA1 (1/1)/Q9QZK6<br><b>C3)</b> HtrA3 (1/1)/Q9D236<br><b>C4)</b> Interleukin 16 (1/4)/Q9QZP6<br><b>C5)</b> LARG (1/1)/Q8R4H2<br><b>C6)</b> LIN-7A (1/1)/Q8JZS0<br><b>C7)</b> Lin7c (1/1)/Q88952<br><b>C8)</b> Lnx1 (2/4)/O70263<br><b>C9)</b> Lnx1 (3/4)/O70263<br><b>C10)</b> Lrrc7 (1/1)/Q80TE7                                 | <b>D1)</b> sigma/NP_006133<br><b>D2)</b> beta/alpha/NP_647539.1<br><b>D3)</b> epsilon/NP_006752<br><b>D4)</b> gamma/CAG46702<br><b>D5)</b> eta/CAG30498<br><b>D6)</b> theta/NP_006817<br><b>D7)</b> zeta/delta/NP_663723<br><b>D8)</b> SMG5/NP_056142<br><b>D9)</b> SMG7/NP_963862 |
| <b>E1)</b> Magi-1 (2/6)/Q6RHR9<br><b>E2)</b> Magi-1 (4/6)/Q6RHR9<br><b>E3)</b> Magi-1 (6/6)/Q6RHR9<br><b>E4)</b> Magi-2 (2/6)/Q9WVQ1<br><b>E5)</b> Magi-2 (5/6)/Q9WVQ1<br><b>E6)</b> Magi-2 (6/6)/Q9WVQ1<br><b>E7)</b> Magi-3 (5/6)/Q9EQJ9<br><b>E8)</b> Mais2 (1/1)/lin-7/Q9HAP6<br><b>E9)</b> Magi-3 (1/6)/Q9EQJ9<br><b>E10)</b> Sempcap3 (1/2)/Q69ZS0           | <b>F1)</b> Mpp7 (1/1)/Q8BVD5<br><b>F2)</b> MUPP1 (5/13)/Q8VBX6<br><b>F3)</b> MUPP1 (10/13)/Q8VBX6<br><b>F4)</b> MUPP1 (11/13)/Q8VBX6<br><b>F5)</b> MUPP1 (12/13)/Q8VBX6<br><b>F6)</b> MUPP1 (13/13)/Q8VBX6<br><b>F7)</b> nNOS (1/1)/Q9Z0J4<br><b>F8)</b> OMP25 (1/1)/Q8K4F3<br><b>F9)</b> PAR-3 (3/3)/Q99NH2<br><b>F10)</b> Shank3 (1/1)/Q4ACU6 | <b>G1)</b> NHERF-1 (1/2)/P70441<br><b>G2)</b> NHERF-1 (2/2)/P70441<br><b>G3)</b> NHERF-1 FL/P70441 *<br><b>G4)</b> NHERF-2 (1/2)/Q9JHL1<br><b>G5)</b> NHERF-2 (2/2)/Q9JHL1<br><b>G6)</b> NHERF-2 FL/Q9JHL1 *<br><b>G7)</b> Pdzk1 (1/4)/NHERF-3/Q9JIL4<br><b>G8)</b> Pdzk1 (3/4)/NHERF-3/Q9JIL4<br><b>G9)</b> Pdzk3 (1/4)/NHERF-4/Q99MJ6<br><b>G10)</b> Pdzk3 (3/4)/NHERF-4/Q99MJ6 |                                                                                                                                                                                                                                                                                    |
| <b>H1)</b> PAR6B (1/1)/Q9JK83<br><b>H2)</b> Pdlim5 (1/1)/Q3UGD0<br><b>H3)</b> Pdzk11 (1/1)/Q9CGZ9<br><b>H4)</b> PDZ-RGS3 (1/1)/Q9DC04<br><b>H5)</b> PSD95 (1/3)/Q62108<br><b>H6)</b> PSD95 (2/3)/Q62108<br><b>H7)</b> PSD95 (3/3)/Q62108<br><b>H8)</b> PTP-BL (2/5)/Q64512<br><b>H9)</b> PAR3B (1/3)/Q5SV53<br><b>H10)</b> TIP-1 (1/1)/Q9DBG9                      | <b>I1)</b> SAP102 (2/3)/P70175<br><b>I2)</b> SAP102 (3/3)/P70175<br><b>I3)</b> SAP97 (1/3)/Q811D0<br><b>I4)</b> SAP97 (2/3)/Q811D0<br><b>I5)</b> SAP97 (3/3)/Q811D0<br><b>I6)</b> Scrbl (3/4)/Q80U72<br><b>I7)</b> Shank1 (1/1)/D3YZU1<br><b>I8)</b> Pdzk3 (1/6)/E9Q1M1<br><b>I9)</b> Pdzk3 (2/6)/E9Q1M1                                        | <b>J1)</b> Shroom (1/1)/Q9QXN0<br><b>J2)</b> SLIM (1/1)/Q8R1G6<br><b>J3)</b> Tiam2 (1/1)/Q6ZPF3<br><b>J4)</b> Whirlin (3/3)/Q5MLF8<br><b>J5)</b> ZO-1 (1/3)/P39447<br><b>J6)</b> ZO-1 (2/3)/P39447<br><b>J7)</b> ZO-2 (1/3)/Q9Z0U1<br><b>J8)</b> ZO-3 (1/3)/Q9QXY1<br><b>J9)</b> Scrbl (1/4)/Q80U72<br><b>J10)</b> Scrbl (2/4)/Q80U72                                             |                                                                                                                                                                                                                                                                                    |

\*= Non-Codon Optimized Construct

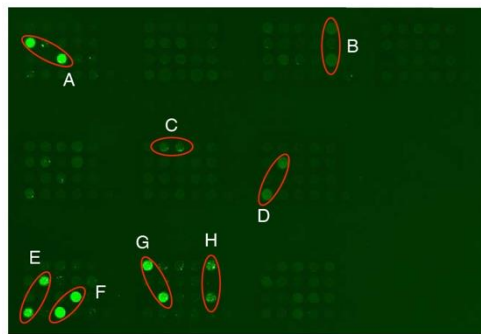

Cx36 CT tip - 100 μg  
Biotin-VSPNFGRTQSSDSAYV-COOH

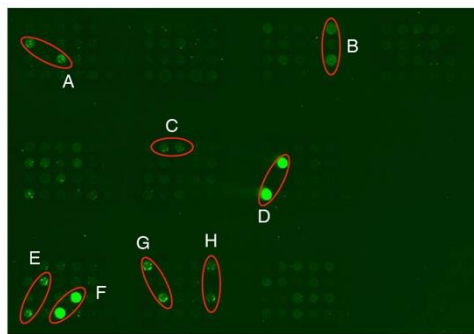

Cx36 phospho-CT tip - 100 μg  
Biotin-VSPNFGRTQ[ps]SDSAYV-COOH

- A. Chapsyn-110 (2/3) PDZ
- B. Interleukin 16 (1/4) PDZ
- C. MUPP1 (5/13) PDZ
- D. NHERF-2 FL
- E. PSD95 (2/3) PDZ
- F. PTP-BL (2/5) PDZ
- G. SAP102 (2/3) PDZ
- H. SAP97 (2/3) PDZ
- I. Grip1 (6/7) PDZ

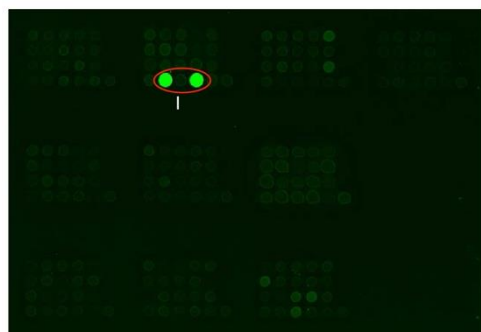

Scrambled - 927206 - 100 μg  
Biotin-QRTDNKSRALSGYRVEV-COOH

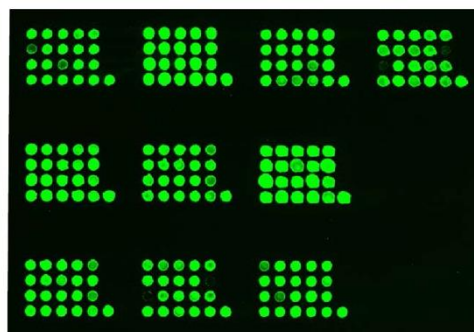

αGST

**Supplementary Figure 1.** C-terminal domain readers microarray probed with mmCx36 peptides. Note that although the scrambled peptide sequence was generated by reassigning residues of Cx36 peptides with a random number generator, a PDZ-binding site was generated that binds to Grip1.

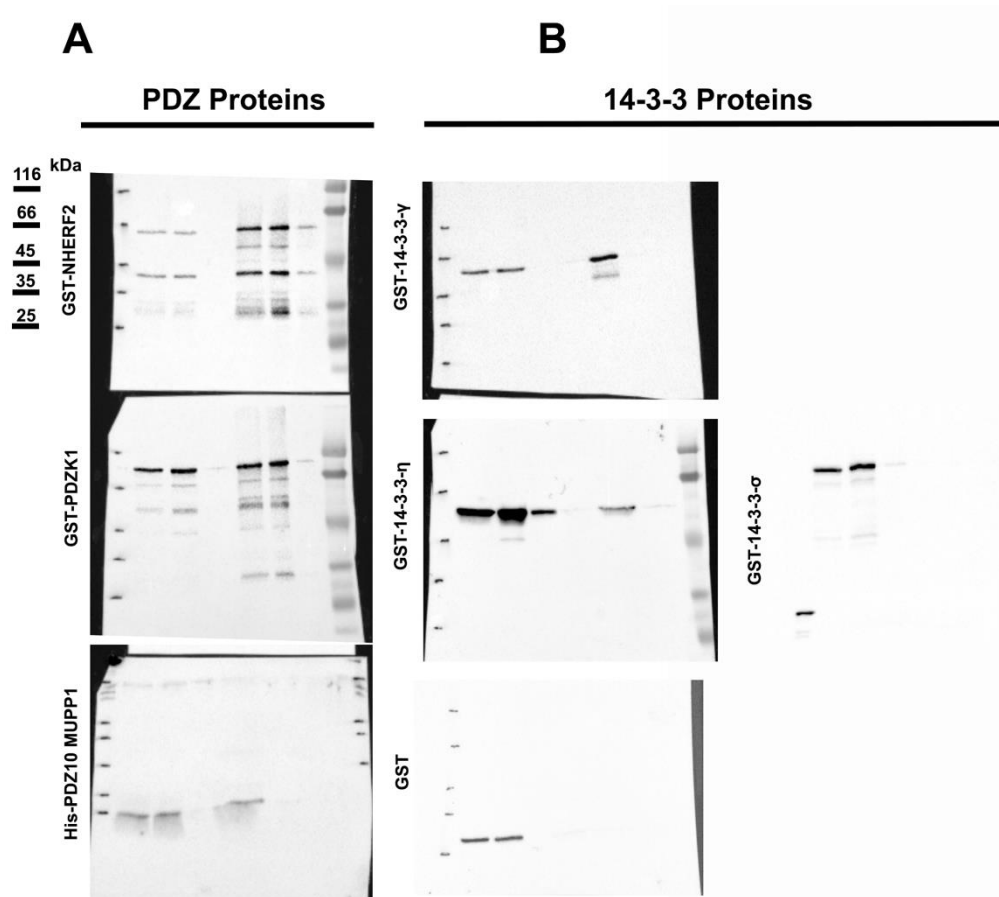

**Supplementary Figure 2.** Original blots of pull-down experiments. **(A)** Original blots of pull-down experiments with PDZ proteins. **(B)** Original blots of pull-down experiments with GST-tagged 14-3-3 proteins.

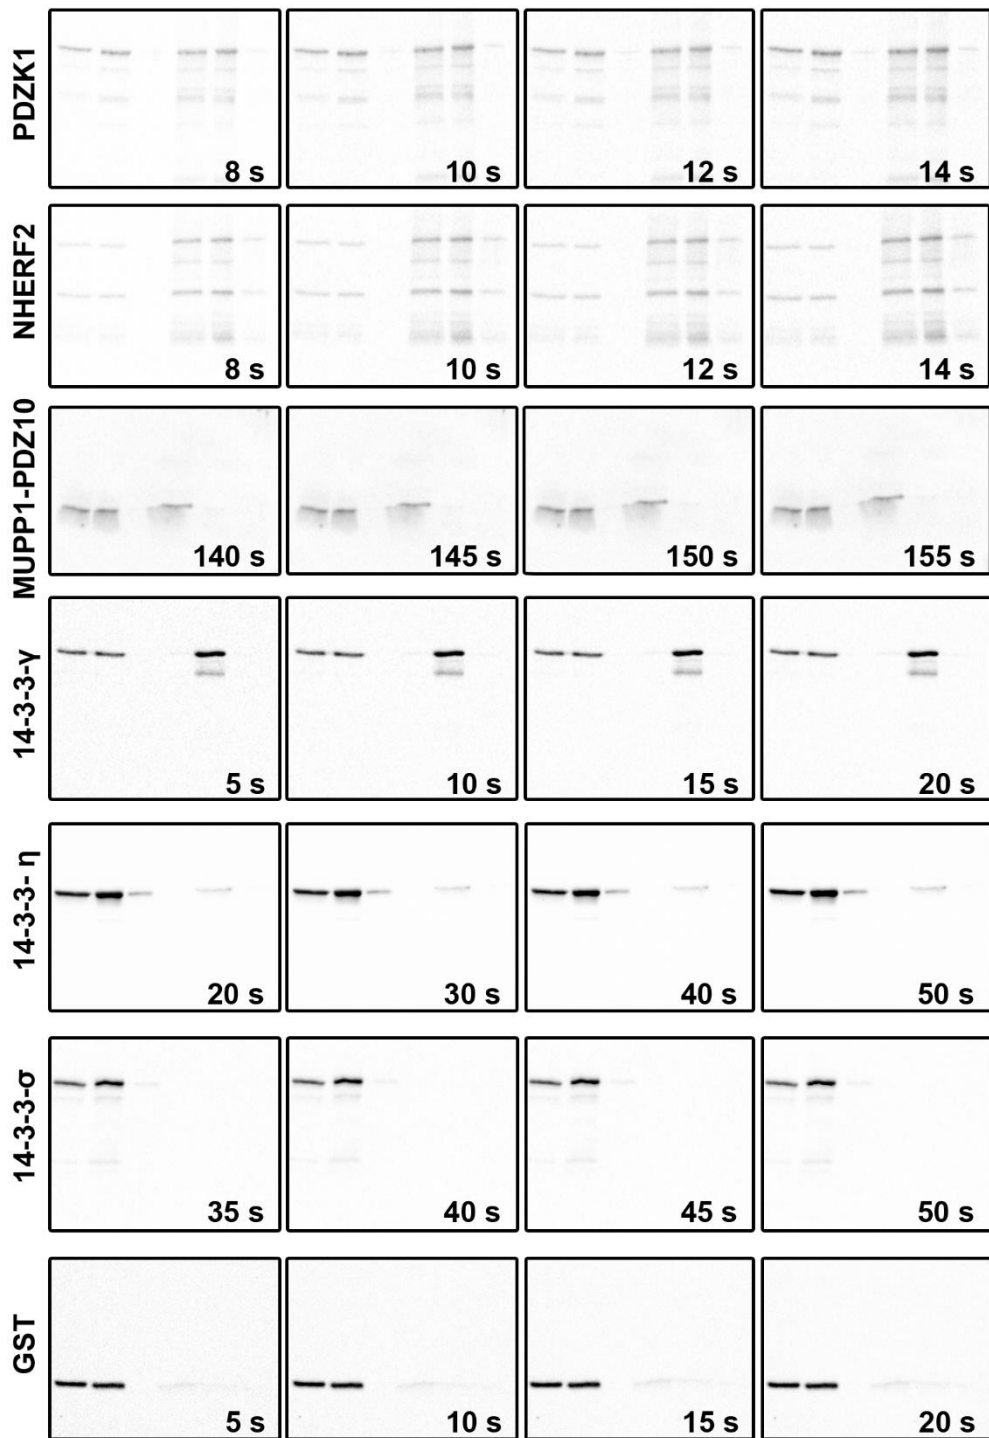

**Supplementary Figure 3.** Blots of pull-down experiments with variable exposure times.

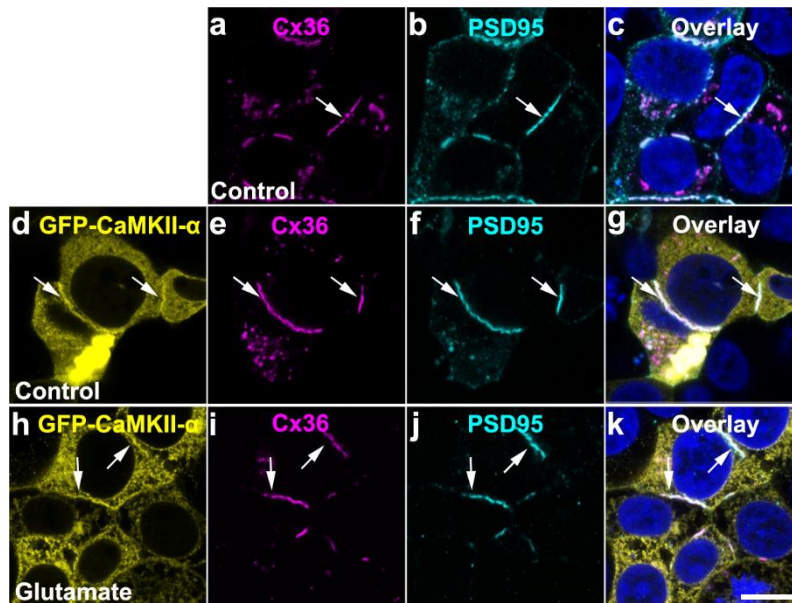

**Supplementary Figure 4. Activation of co-expressed CaMKII did not cause any apparent changes in Cx36/PSD95 association. (a-c)** Colocalization of Cx36 and PSD95 at gap junctions (arrow) in co-transfected HEK293 cells. **(d-g)** Co-expression of CaMKII- $\alpha$  with Cx36 and PSD95 in HEK293 cells. **(h-k)** Activation of co-transfected CaMKII by treatment with glutamate (100  $\mu$ M) did not affect the localization of PSD95 at Cx36-containing gap junctions. Arrows in a-k point to gap junctions between two adjacent cells. Scale: 10  $\mu$ m.
